# Supplementary material for: Common microscopic origin of the phase transitions in Ta2NiS5 and the excitonic insulator candidate Ta2NiSe5
Source: Springer Nature journal article supplement (doi:10.1038/s41524-021-00675-6), 2021-12-20
Supplement: MOESM1 [file 41524_2021_675_MOESM1_ESM.pdf]

1           Supplementary Information to "Common  
 2           microscopic origin of the phase transitions in  
 3           Ta<sub>2</sub>NiS<sub>5</sub> and the excitonic insulator  
 4           candidate Ta<sub>2</sub>NiSe<sub>5</sub>"

5           Lukas Windgätter<sup>1\*</sup>, Malte Rösner<sup>2</sup>, Giacomo  
 6           Mazza<sup>6</sup>, Hannes Hübener<sup>1</sup>, Antoine Georges<sup>3,4,5,6</sup>, Andrew J.  
 7           Millis<sup>5,7</sup>, Simone Latini<sup>1\*</sup> and Angel Rubio<sup>1,5,8\*</sup>

8           <sup>1</sup>Max Planck Institute for the Structure and Dynamics of Matter,  
 9           Luruper Chaussee 149, 22761 Hamburg, Germany.

10          <sup>2</sup> Radboud University, Institute for Molecules and Materials,  
 11          Heijendaalseweg 135, 6525 AJ Nijmegen, Netherlands.

12          <sup>6</sup>Department of Quantum Matter Physics, University of Geneva,  
 13          Quai Ernest-Ansermet 24, 1211 Geneva, Switzerland.

14          <sup>3</sup>Collège de France, 11 place Marcelin Berthelot, 75005 Paris,  
 15          France.

16          <sup>4</sup> Center for Computational Quantum Physics, Flatiron Institute,  
 17          New York, New York 10010, USA.

18          <sup>5</sup> CPHT, CNRS, Ecole Polytechnique, IP Paris, F-91128  
 19          Palaiseau, France.

20          <sup>7</sup>Department of Physics, Columbia University, New York, New  
 21          York 10027, USA.

22          <sup>8</sup>Nano-Bio Spectroscopy Group, Departamento de Física de  
 23          Materiales, Universidad del País Vasco, 20018 San Sebastian,  
 24          Spain.

25                   \*Corresponding author(s). E-mail(s):

26                   [lukas.windgaetter@mpsd.mpg.de](mailto:lukas.windgaetter@mpsd.mpg.de); [simone.latini@mpsd.mpg.de](mailto:simone.latini@mpsd.mpg.de);  
 27                   [angel.rubio@mpsd.mpg.de](mailto:angel.rubio@mpsd.mpg.de);

## Supplementary Note 1

The bandstructures have been computed along the path  $M=(\frac{\pi}{a}, 0, \frac{\pi}{c})$ ,  $Z=(0, 0, \frac{\pi}{c})$ ,  $\Gamma=(0, 0, 0)$  and  $X=(\frac{\pi}{a}, 0, 0)$ .

## Supplementary Note 2: Total energy minimum with different functionals

To track the total energy changes during the relaxation for different functionals we have computed the energy of the system along the structural transition. We employed again the  $d$  parameter introduced in section 2.4 of the main text to parameterize the transition. The resulting total energy vs  $d$  distortion graph is shown in Supplementary Figure 1. For all functionals the total energy is displayed with the orthorhombic value set 0 eV. The figure shows, that using the PBE functional has the energy minimum at slightly lower values for the distortion and the HSE has its energy minimum at stronger distortion values of  $d$ . Nevertheless, a monoclinic structure is energetically more stable than the orthorhombic geometry for all investigated functionals.

## Supplementary Note 3: Spin-Orbit Coupling

The results for the PBE, mBJ and HSE03 with and without Spin-Orbit Coupling (SOC) functional are shown in the Supplementary Figures 2, 3 and 4. They show that SOC leads to a bandsplitting which is most apparent on the M-Z path for all band dispersions. Note, that this band splitting is not a splitting of spin up and down states. Near the bandedge the spin orbit coupling has just a small influence on the bandstructures. Only for the monoclinic geometry of TNSe using the PBE functional changes are apparent with the bandgap halving and the becoming and direct at  $\Gamma$ . A detailed comparison of the obtained bandgaps is presented in Supplementary Table 6. We conclude, that the effects of SOC are negligible for our discussion in the main text. These results are in agreement with a prior study by Sugimoto et al. [1].

## Supplementary Note 4: Increasing the exchange-correlation contribution in the functionals

Increasing the exchange and correlation contribution considered in either the HSE hybrid functionals or the modified-Becke-Johnson functional will lead to a bandgap opening even in the orthorhombic unit cell. In the modified Becke-Johnson (mBJ) functional the amount of exchange and correlation interaction included is controlled by the  $c$  parameter. It controls the amount of Becke-Roussel exchange [2, 3], which approximates exact exchange effects via an effective potential, plus a screening term [4]. In the HSE hybrid functionals the exact exchange contribution is calculated directly using the Kohn-Sham orbitals during the self consistent iterations. Parts of the PBE exchange interaction are replaced by the exact exchange interaction [5]. The admixture of

67 exact and PBE exchange in the functional is controlled by the mixing param-  
 68 eter  $\alpha$  which is commonly set to 0.25 for the HSE functionals. Varying it we  
 69 can modify the amount of exchange interaction analogously to varying the  $c$   
 70 parameter in the mBJ functional. The results are shown in the Supplemen-  
 71 tary Figure 5 and Supplementary Figure 6. We see, that for values of  $c = 1.6$   
 72 or higher a bandgap opens, while the system is still metallic for the self con-  
 73 sistentlly calculated  $c$ -Value of 1.26. Analogously we can control the amount of  
 74 exchange and correlation included in the range separated hybrid functionals.  
 75 To test this we have varied the mixing parameter  $\alpha$ , while keeping the range  
 76 separation parameter at 0.3. This way  $\alpha = 0.25$  reproduces the result for the  
 77 HSE03 functional. The resulting bandstructures can be seen in Supplementary  
 78 Figure 6. The behaviour is similar to the mBJ case, with the orthorhombic  
 79 cell becoming a semiconductor for values of  $\alpha > 0.45$ .

### 80 **Supplementary Note 5: Minimally symmetry broken** 81 **electron dispersion**

82 We used the displacement parameter  $d$  as defined in section 3 of the main  
 83 text to introduce a minimal distortion to the lattice ( $d=0.05$ ). This procedure  
 84 breaks the relevant orthorhombic lattice symmetries. If the phase transition of  
 85 TNSe is fully electronic the breaking of the symmetries should already induce  
 86 the metal to semiconductor transition. The result for the electronic dispersion  
 87 of the symmetry broken geometry is shown in Supplementary Figure 8. We see  
 88 that all bandstructures, independent of the exchange correlation functional,  
 89 do not exhibit a metal to insulator transition or a significant gap opening. In  
 90 fact they agree very well with the exact orthorhombic results.

### 91 **Supplementary Note 6: STS Gap Correction**

92 In STS measurements a metal to semiconductor transition has been reported  
 93 at the critical temperature for TNSe [6]. The reported bandgap is 300 meV and  
 94 is significantly bigger than the bandgap obtained from optics measurements of  
 95 160 meV [7]. The discrepancy can be explained taking the different geometries  
 96 of the investigated samples of TNSe in account. The sample used for the STS  
 97 measurement exhibits an  $\beta$ -angle of  $92.5^\circ$  and is such significantly bigger than  
 98 the literature result of  $90.5^\circ$ - $90.7^\circ$  [8, 9]. To correct the bandgap taking this  
 99 discrepancy into account, we computed the bandstructures for both our mono-  
 100 clinic unit cell as well as a unit cell with  $92.5^\circ$   $\beta$ -angle. The obtained bandgaps  
 101 are 40meV for our relaxed geometry and 66 meV for the  $92.5^\circ$  geometry using  
 102 the PBE functional. Taking the ratio of these two and multiplying the 300  
 103 meV experimental gap, we obtain a correction of the STS gap to 181 meV.

### 104 **Supplementary Note 7: Convergence of the $G_0W_0$** 105 **calculations**

106 We present the details of the convergence of the  $G_0W_0$  calculation for the  
 107 monoclinic unit cell. To display the convergence behaviour of the calculation

108 we performed convergence studies for the number of k-Points needed in each  
 109 direction, the number of unoccupied bands and the energy cutoff we have to  
 110 consider for the response function calculation and size of the frequency grid  
 111 of the frequency integration. It is important to note, that the energy cutoff  
 112 for the response function and the number of unoccupied states are not inde-  
 113 pendent convergence parameters and thus, we use the standard method and  
 114 converge them simultaneously [10]. The bandstructures have been obtained  
 115 via post-processing using the Wannier90 package [11].

116 For the presented convergence studies we have employed the Density Func-  
 117 tional Theory solution using the PBE functional as starting point. A discussion  
 118 of the effect using different functionals such as the HSE hybrid functional is  
 119 in the section 2.3 of the main text.

120 For the bandstructure convergence of TNSe with varying k-mesh we will  
 121 assume that the spatial directions for the k-mesh converge independently and  
 122 perform a series of calculations with varying grid size in all three directions.  
 123 To measure the convergence of the bandstructure we will compute the funda-  
 124 mental bandgap and extrapolate using a function  $f(x) = a + b/(x + c)$  with  $a, b$   
 125 and  $c$  as fitting parameters. For these k-mesh calculations we used 640 unoc-  
 126 cupied states with a 80eV Cutoff for the response function and 160 frequency  
 127 grid points in the calculation of the screened interaction. The k-meshes are  
 128  $k_x \times 4 \times 2$ ,  $12 \times k_y \times 4$  and  $12 \times 4 \times k_z$  with  $k_x, k_y$  and  $k_z$  are varied. The  
 129 result is shown in Supplementary Figure 13. One sees, that the convergence  
 130 in  $k_y$  and  $k_z$  along the corresponding reciprocal lattice directions converges  
 131 quite fast. This is different for  $k_x$  as the bandstructure is highly dispersive in  
 132 x-direction and many grid-points are needed to sample it accurately.

133 We also performed a simultaneous convergence of the energy cutoff for the  
 134 response function and the number of unoccupied states. Convergence against  
 135 the exact result should be in first order proportional to  $1/\text{Number of unoccu-}$   
 136  $\text{piated states [10]}$ . We have performed the convergence calculation in the standard  
 137 way increasing response function cutoff and the number of included orbitals  
 138 simultaneously. The given combinations are shown in Supplementary Table 8.  
 139 The result of the energy convergence is presented in Supplementary Figure 14.  
 140 We see, that including 1160 unoccupied states leads to a quite well converged  
 141 bandgap already.

142 Lastly we also investigate of the convergence with increasing number of  
 143 frequency grid points. This time the test setup is a k-mesh of  $12 \times 4 \times 2$  with  
 144 880 unoccupied states and a 100eV Cutoff. The result is shown in Fig 15. We  
 145 see, that full convergence is only achieved for a large number of frequencies  
 146 considered due to the small bandgap.

## 147 Supplementary Note 8: BSE Convergence

148 We also investigated the convergence behaviour of the solution of the Bethe-  
 149 Salpether equation [12, 13] for the monoclinic phase of TNSe. We performed  
 150 the BSE using the eigenenergies and screened interaction from the  $G_0W_0$  calcu-  
 151 lation. The calculations show, that for all convergence parameters the excitonic

152 binding energy decreases proportional to the bandgap. This together with the  
 153 fact, that even more converged  $G_0W_0$  calculations in  $k_x$  tend to increase the  
 154  $G_0W_0$  bandgap suggests, that for the material the excitonic binding energy  
 155 does not exceed the bandgap. A detailed analysis of all relevant convergence  
 156 parameters follows:

157 The solution of the Bethe-Salpeter equation is very sensitive to the k-  
 158 mesh. Thus, we investigated the solution of the BSE with an increasing k-mesh  
 159 along the three different axes. We use a test setup with 160 frequencies for the  
 160 calculation of the screened interaction, 640 unoccupied states (80eV cutoff)  
 161 during the  $G_0W_0$  calculation and include again the first 12 valence and 14  
 162 conduction bands in the BSE. The k-meshes used are  $k_x \times 4 \times 2$ ,  $8 \times k_y \times 2$  and  
 163  $8 \times 4 \times k_z$ , where  $k_x$ ,  $k_y$  and  $k_z$  are variable and are successively increased.  
 164 The results are depicted in Supplementary Figure 16. We see, that while the  
 165 dielectric function converges quickly with an increasing k-mesh in y-direction  
 166 and z-direction, we need many k-points in  $k_x$  direction to obtain a reasonable  
 167 result. The reason is, that the bandgap minimum is shifted slightly toward x-  
 168 direction after the  $G_0W_0$  calculation and therefore only very dense k-meshes  
 169 can sample the highly dispersive energies in x-direction.

170 Secondly, we investigate the effect onto the BSE calculation for an increas-  
 171 ing cutoff in the  $G_0W_0$  calculation and an increasing number of unoccupied  
 172 states. The test setup is working with a  $12 \times 4 \times 2$  k-mesh, 160 frequencies for  
 173 the calculation of the screened interaction and including the first 12 valence  
 174 and 14 conduction band states in the BSE. We employed the Tamm-Dancoff  
 175 approximation [13, 14]. The results are depicted in Supplementary Figure 17.  
 176 Using 880 unoccupied states with a 80eV cutoff already gives a well converged  
 177 dielectric function and excitonic binding energies.

178 The third convergence parameter we investigate is the effect of including an  
 179 increasing number of frequencies in the computation of the screened interaction  
 180 onto the result of the Bethe-Salpeter equation. The test setup is using a  $12 \times 4 \times 2$   
 181 k-mesh, 640 unoccupied states and the first 12 valence and 14 conduction band  
 182 states in the BSE. The results are depicted in Supplementary Figure 18. We  
 183 see, that the BSE solution converges quite fast with the number of frequencies  
 184 included in the calculation of the screened interaction. The dielectric function  
 185 only obtains a rigid shift, which can be explained by the decreasing bandgap  
 186 of the underlying  $G_0W_0$  bandstructure calculation.

187 Lastly, we show the BSE convergence properties with an increasing number  
 188 of valence and conduction bands included in the BSE calculation. The test  
 189 setup includes a  $12 \times 4 \times 2$  k-mesh, 880 unoccupied states, a 80 eV cutoff and  
 190 160 frequencies in the calculation of the screened interaction. The number of  
 191 valence ( $v$ ) and conduction bands ( $c$ ) included is varied. The convergence of  
 192 the dielectric function and the eigenvalues of the BSE solution is displayed in  
 193 the Supplementary Figure 19. We see, that we always obtain well converged  
 194 eigenvalues, but need to include at least the first 12 valence and the first 14  
 195 conduction bands around the Fermi level to obtain a fully converged dielectric  
 196 function. The excitonic eigenvalues are already very well converged only the  
 197 first valence and conduction bands.

|                | a (in Å) | b (in Å) | c (in Å) |
|----------------|----------|----------|----------|
| Experiment [9] | 3.492    | 12.814   | 15.649   |
| vdW-optB88     | 3.517    | 12.982   | 15.776   |
| vdW-optPBE     | 3.532    | 13.325   | 15.845   |
| PBE            | 3.510    | 14.160   | 15.776   |

**Supplementary Table 1** Lattice parameters after full relaxation of the TNSe compound in the monoclinic phase using different functionals. The experimental reference data has been measured at 30K via X-ray diffraction [9]. The theory calculations are performed at T=0K.

|                | a (in Å) | b (in Å) | c (in Å) |
|----------------|----------|----------|----------|
| Experiment[15] | 3.503    | 12.870   | 15.677   |
| vdW-optB88     | 3.512    | 12.993   | 15.771   |
| vdW-optPBE     | 3.526    | 13.252   | 15.834   |
| PBE            | 3.504    | 14.190   | 15.762   |

**Supplementary Table 2** Lattice parameters after relaxation of the TNSe compound with enforced orthorhombic symmetry. The experimental values have been obtained via X-ray diffraction at T=400K [15]. The theory calculations are performed at T=0K.

|               | a (in Å) | b (in Å) | c (in Å) |
|---------------|----------|----------|----------|
| Experiment[8] | 3.415    | 12.146   | 15.097   |
| orthorhombic  | 3.430    | 12.200   | 15.203   |
| monoclinic    | 3.428    | 12.223   | 15.203   |

**Supplementary Table 3** Lattice parameters for TNS of both the orthorhombic phase and the monoclinic phase obtained via full relaxation. The experimental values have been measured via X-ray diffraction at T=278 K. [8].

| lattice vector | x (in Å)   | y (in Å)   | z (in Å)    |
|----------------|------------|------------|-------------|
| a              | 3.51177786 | 0.00000000 | 0.00000000  |
| b              | 1.75588893 | 6.49659343 | 0.00000000  |
| c              | 0.00000000 | 0.00000000 | 15.77141641 |
| species        | a          | b          | c           |
| Ta             | 0.22143275 | 0.55713450 | 0.88896088  |
| Ta             | 0.22143275 | 0.55713450 | 0.61103912  |
| Ta             | 0.77856725 | 0.44286550 | 0.11103912  |
| Ta             | 0.77856725 | 0.44286550 | 0.38896088  |
| Ni             | 0.70190352 | 0.59619297 | 0.75000000  |
| Ni             | 0.29809648 | 0.40380703 | 0.25000000  |
| Se             | 0.58116235 | 0.83767530 | 0.86174128  |
| Se             | 0.58116235 | 0.83767530 | 0.63825872  |
| Se             | 0.41883765 | 0.16232470 | 0.13825872  |
| Se             | 0.41883765 | 0.16232470 | 0.36174128  |
| Se             | 0.14695064 | 0.70609873 | 0.04873952  |
| Se             | 0.14695064 | 0.70609873 | 0.45126048  |
| Se             | 0.85304936 | 0.29390127 | 0.95126048  |
| Se             | 0.85304936 | 0.29390127 | 0.54873952  |
| Se             | 0.32729988 | 0.34540023 | 0.75000000  |
| Se             | 0.67270012 | 0.65459977 | 0.25000000  |

**Supplementary Table 4** Result of the relaxation of the orthorhombic cell with Cmc<sub>m</sub> symmetry obtained using the vdW-optB88 functional. The atoms are given in units of the lattice vectors a, b and c

| lattice vector | x (in Å)      | y (in Å)      | z (in Å)      |
|----------------|---------------|---------------|---------------|
| a              | 3.5172791481  | 0.0000000000  | 0.0000000000  |
| b              | 1.7642919084  | 6.4903780477  | 0.0000000000  |
| c              | -0.1695581062 | -0.0018790259 | 15.7763685968 |
| species        | a             | b             | c             |
| Ta             | 0.788009744   | 0.446403261   | 0.888662426   |
| Ta             | 0.765747213   | 0.446396149   | 0.611343122   |
| Ta             | 0.209582861   | 0.558275853   | 0.111357977   |
| Ta             | 0.231832330   | 0.558274801   | 0.388645515   |
| Ni             | 0.297194687   | 0.407655269   | 0.750000961   |
| Ni             | 0.701051209   | 0.596787458   | 0.250006008   |
| Se             | 0.411119367   | 0.165767233   | 0.861499543   |
| Se             | 0.424071823   | 0.165757101   | 0.638461393   |
| Se             | 0.586395710   | 0.838882702   | 0.138539629   |
| Se             | 0.573462842   | 0.838897364   | 0.361493392   |
| Se             | 0.859540334   | 0.295478962   | 0.048418035   |
| Se             | 0.845322448   | 0.295464258   | 0.451556475   |
| Se             | 0.137960710   | 0.709232641   | 0.951592761   |
| Se             | 0.152210287   | 0.709218409   | 0.548427477   |
| Se             | 0.670947177   | 0.658753928   | 0.750003802   |
| Se             | 0.327025141   | 0.345806896   | 0.249991137   |

**Supplementary Table 5** Result of the relaxation of the triclinic cell using the vdw-optB88 functional. The atomic positions are given in units of the lattice vectors a, b, and c.

|       | TNSe, ortho | TNSe, mono |  | TNSe, ortho,SOC | TNSe, mono, SOC |
|-------|-------------|------------|--|-----------------|-----------------|
| PBE   | metallic    | 40 meV     |  | metallic        | 18 meV (-55%)   |
| mBJ   | metallic    | 101 meV    |  | metallic        | 120 meV (+18%)  |
| HSE03 | metallic    | 183 meV    |  | metallic        | 179 meV (-2%)   |
|       | TNS, ortho  | TNS, mono  |  | TNS, ortho,SOC  | TNS, mono, SOC  |
| PBE   | metallic    | 102 meV    |  | metallic        | 102 meV (+0%)   |
| mBJ   | 42 meV      | 151 meV    |  | 98 meV (+133%)  | 178 meV (+18%)  |
| HSE03 | 248 meV     | 352 meV    |  | 250 meV (+1%)   | 362 meV (+3%)   |

**Supplementary Table 6** Comparison of the obtained bandgaps for TNSe and TNS with various functionals including SOC and neglecting it. We obtain quite good agreement between the SOC result and the non SOC result except for TNSe in the monoclinic phase for the PBE functional.

| Mode | Orthorhombic (THz) | Monoclinic (THz) |
|------|--------------------|------------------|
| 1    | -2.581             | 0.000            |
| 2    | 0.000              | 0.000            |
| 3    | 0.000              | 0.000            |
| 4    | 0.000              | 1.156            |
| 5    | 0.761              | 1.224            |
| 6    | 1.160              | 1.543            |
| 7    | 1.224              | 1.703            |
| 8    | 1.670              | 1.969            |
| 9    | 1.890              | 2.084            |
| 10   | 2.580              | 2.668            |
| 11   | 2.693              | 3.117            |
| 12   | 3.107              | 3.331            |
| 13   | 3.136              | 3.403            |
| 14   | 3.299              | 3.628            |
| 15   | 3.370              | 3.775            |
| 16   | 3.430              | 4.160            |
| 17   | 3.567              | 4.255            |
| 18   | 3.920              | 4.397            |
| 19   | 4.255              | 4.679            |
| 20   | 4.393              | 4.966            |
| 21   | 4.578              | 5.382            |
| 22   | 4.694              | 5.675            |
| 23   | 6.410              | 6.400            |
| 24   | 7.338              | 7.159            |
| 25   | 7.657              | 7.403            |
| 26   | 7.701              | 7.476            |
| 27   | 7.785              | 7.520            |
| 28   | 7.817              | 7.585            |
| 29   | 7.823              | 8.025            |
| 30   | 7.911              | 8.029            |
| 31   | 7.967              | 8.093            |
| 32   | 8.170              | 8.134            |
| 33   | 8.183              | 8.259            |
| 34   | 8.214              | 8.439            |
| 35   | 8.490              | 8.495            |
| 36   | 8.668              | 8.686            |
| 37   | 8.733              | 8.777            |
| 38   | 9.000              | 9.311            |
| 39   | 9.313              | 9.539            |
| 40   | 9.574              | 9.715            |
| 41   | 9.691              | 9.765            |
| 42   | 9.960              | 9.958            |
| 43   | 10.142             | 10.187           |
| 44   | 10.174             | 10.242           |
| 45   | 11.362             | 11.451           |
| 46   | 11.397             | 11.459           |
| 47   | 11.477             | 11.544           |
| 48   | 11.536             | 11.571           |

**Supplementary Table 7** Eigenvalues of the phononic modes of TNS calculated at the  $\Gamma$ -Point.



| cutoff (eV) | orbitals |
|-------------|----------|
| 60          | 640      |
| 80          | 880      |
| 100         | 1160     |
| 120         | 1480     |

**Supplementary Table 8** Energy and orbital cutoff pairs used to check the convergence of the response function in the  $G_0W_0$  calculation.

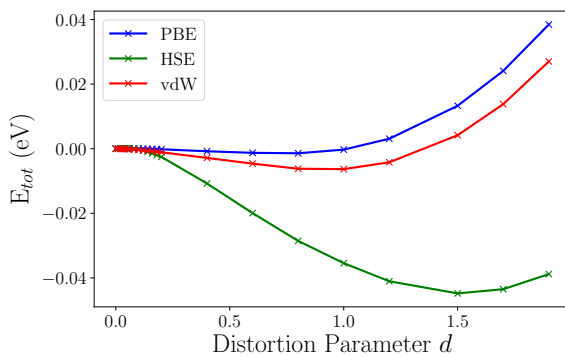

**Supplementary Figure 1** Total energy calculations along the structural transition parameterized by the distortion parameter  $d$ . For all functionals their total energy change has been computed as difference to its orthorhombic value

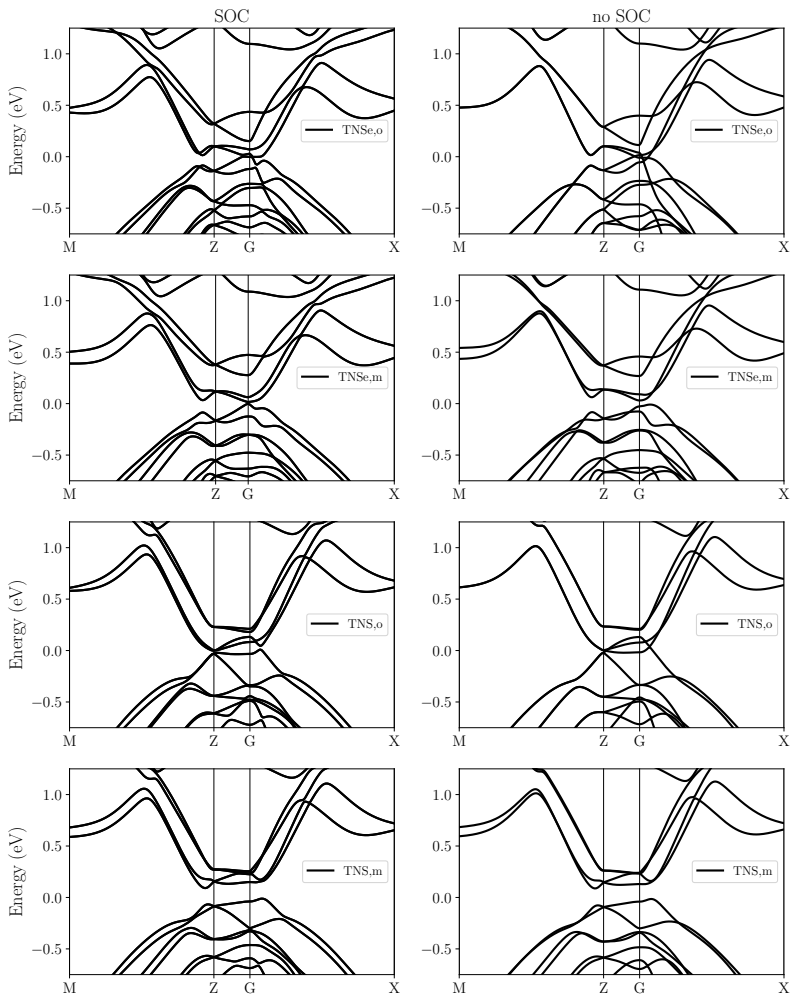

**Supplementary Figure 2** Here we compare the bandstructures obtained with the PBE functional including spin orbit coupling and neglecting it for both structural phases of TNSe and TNS. The letters o and m describe the orthorhombic and monoclinic geometry in the plot labels.

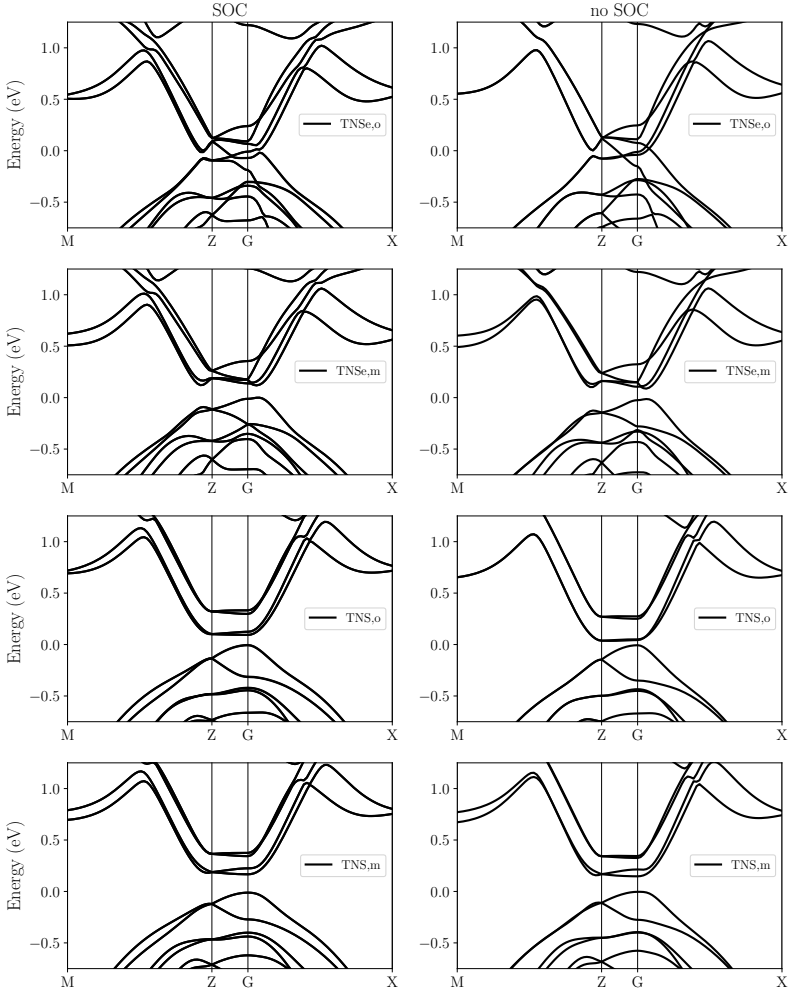

**Supplementary Figure 3** Here we compare the bandstructures obtained with the mBJ functional including spin orbit coupling and neglecting it for both structural phases of TNSe and TNS. The letters o and m describe the orthorhombic and monoclinic geometry in the plot labels.

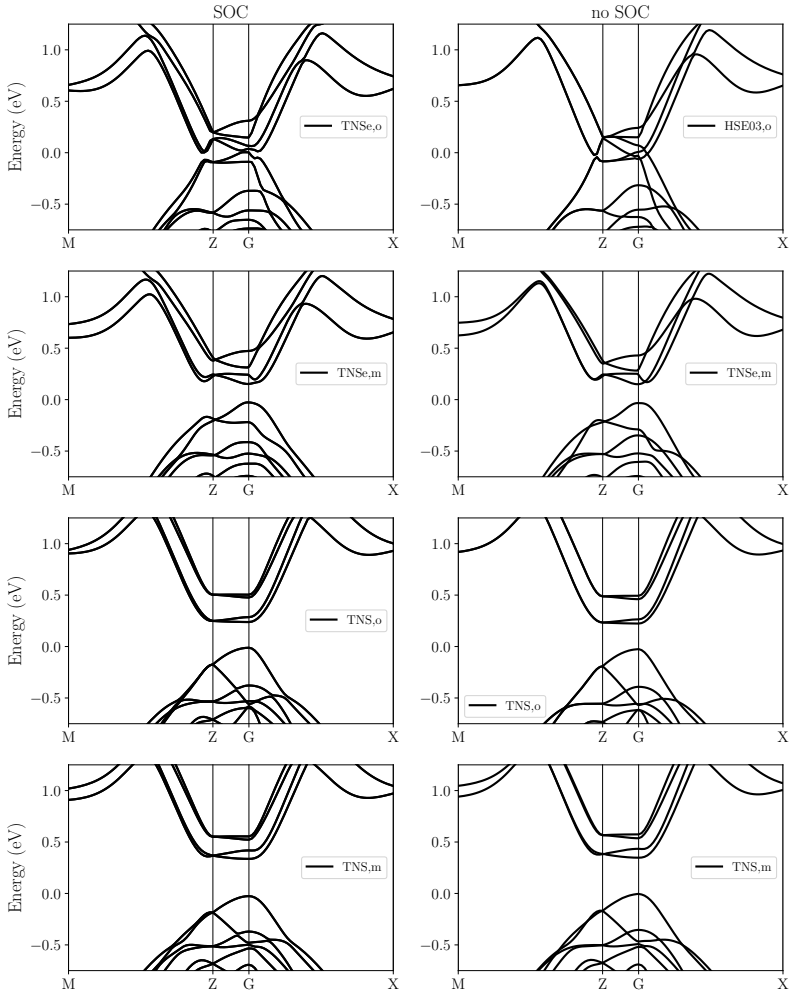

**Supplementary Figure 4** Here we compare the bandstructures obtained with the HSE03 functional including spin orbit coupling and neglecting it for both structural phases of TNSe and TNS. The letters o and m describe the orthorhombic and monoclinic geometry in the plot labels.

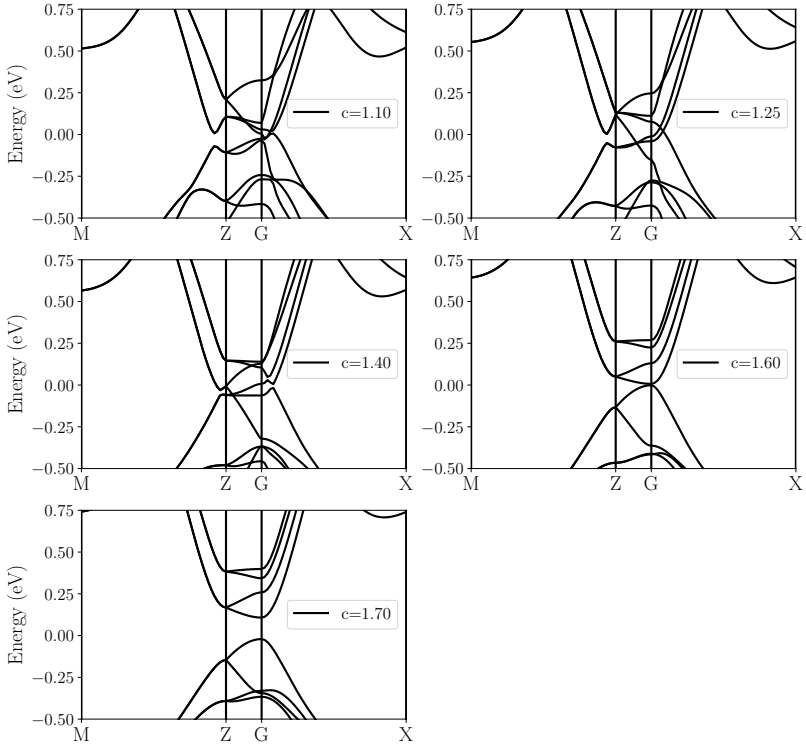

**Supplementary Figure 5** Bandgap opening as we increase the amount of exchange considered in the mBJ-functional by increasing the  $c$ -parameter in the orthorhombic phase. For values higher than 1.6 a gap opens. The self consistently calculated  $c$ -Value is 1.26.

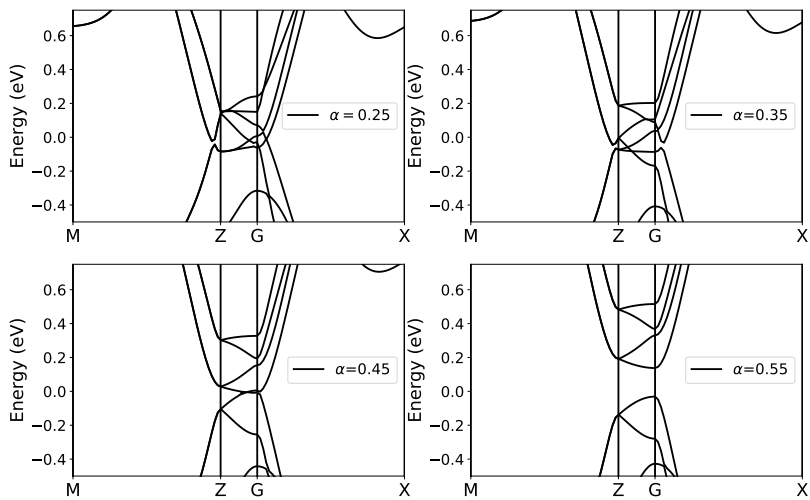

**Supplementary Figure 6** Bandgap opening as we increase the amount of exchange increasing the  $\alpha$ -parameter in the HSE hybrid functionals in the orthorhombic phase. The gap opens with increasing amount of exchange considered. The HSE03 hybrid functional corresponds to  $\alpha = 0.25$ . In all calculations the range separation parameter is chosen to 0.3

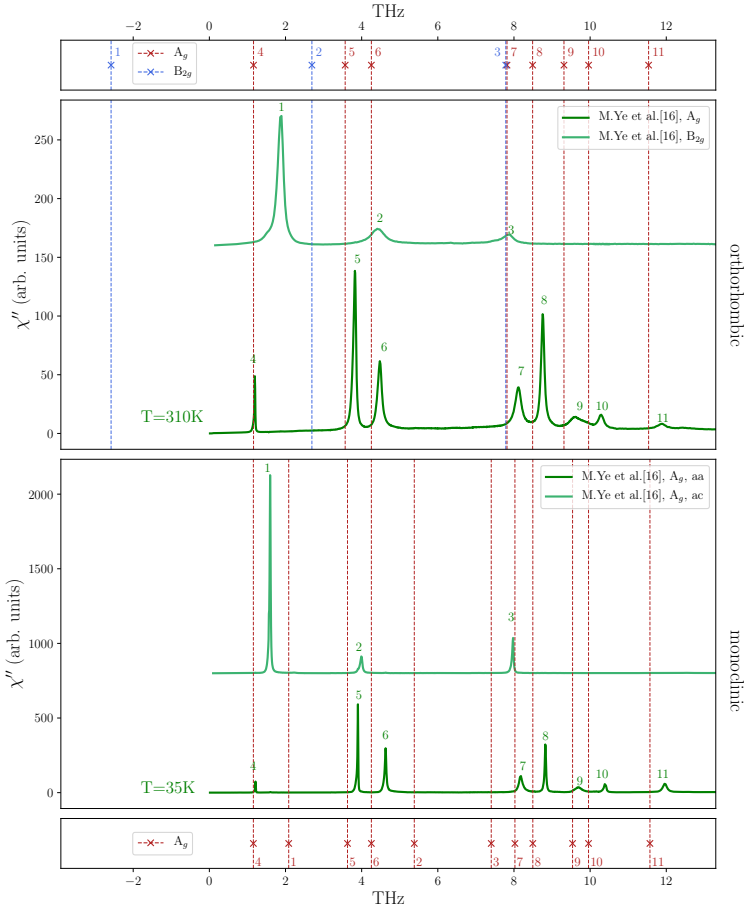

**Supplementary Figure 7** Comparison of the theoretically calculated phonon eigenenergies at  $T=0\text{K}$  with the Raman spectra provided by M.Ye et al. [16] plotted on a linear scale. The top two panels show the orthorhombic phonon spectra and the bottom two panels show the monoclinic phonon spectra. The theory spectra are obtained at  $T=0\text{K}$  and are in good agreement with Raman spectra. Only the first two  $B_{2g}$ -modes show a relevant discrepancy in their eigenenergy.

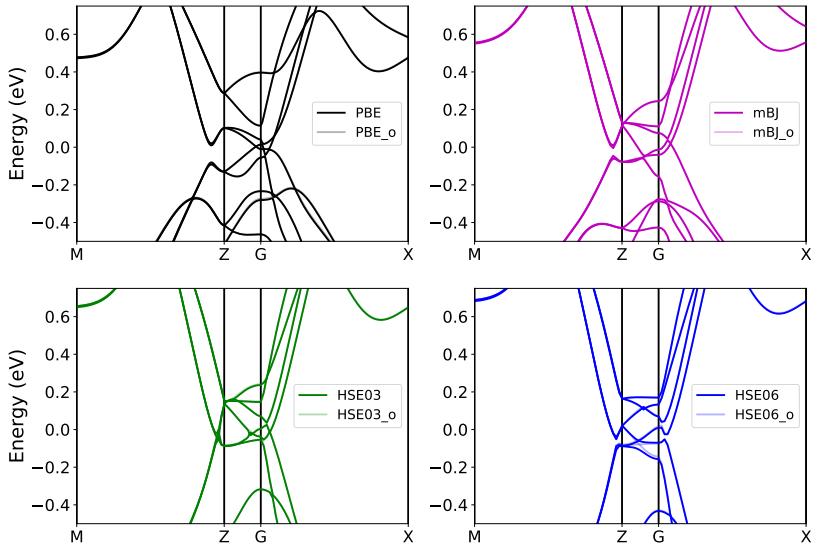

**Supplementary Figure 8** Electronic Dispersion of TNSe for minimally distorted lattice geometry to break the lattice symmetries for different exchange correlation functionals (lattice distortion parameter  $d = 0.05$ ). In shallow colors the exact orthorhombic bandstructure is displayed. We see, that for all exchange correlation functionals orthorhombic and symmetry broken dispersions are almost degenerate. We do not observe a metal to semiconductor transition or a significant gap opening for any functional.

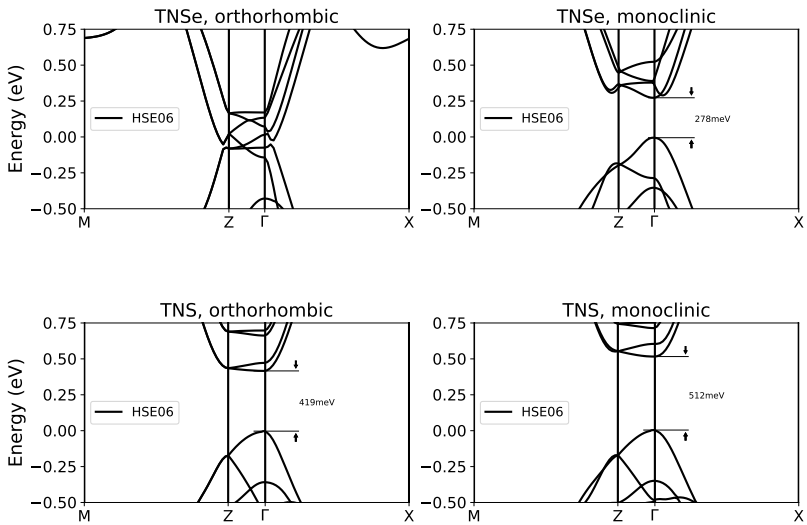

**Supplementary Figure 9** Electronic Dispersion of TNSe and TNS for the orthorhombic and monoclinic geometry using the HSE06 functional.



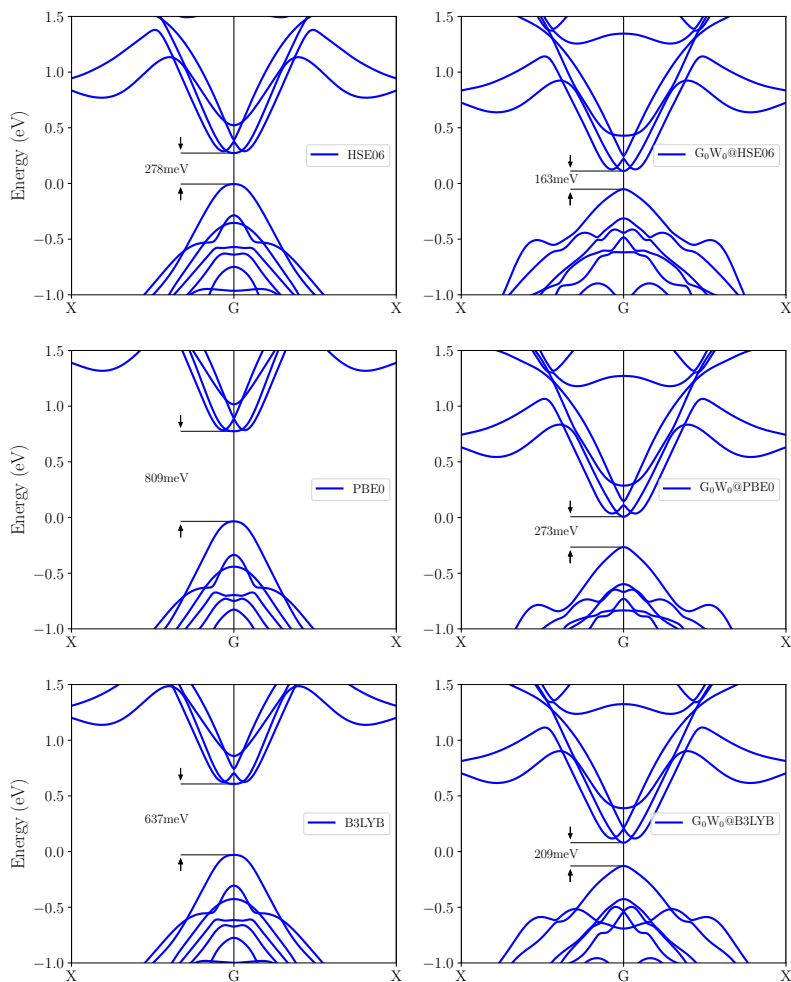

**Supplementary Figure 10** Electronic Dispersion of TNSe for the monoclinic geometry using the  $G_0W_0$  correction for different hybrid functional starting points.

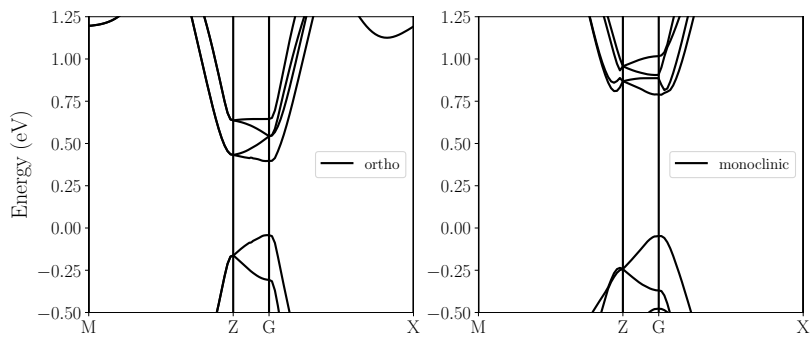

**Supplementary Figure 11** Electronic Dispersion of TNSe for the orthorhombic and monoclinic geometry of TNSe using the Hartree-Fock method. The bandgaps are 438 meV for the orthorhombic and 836 meV for the monoclinic phase. Therefore, Hartree-Fock overestimates the bandgaps significantly.

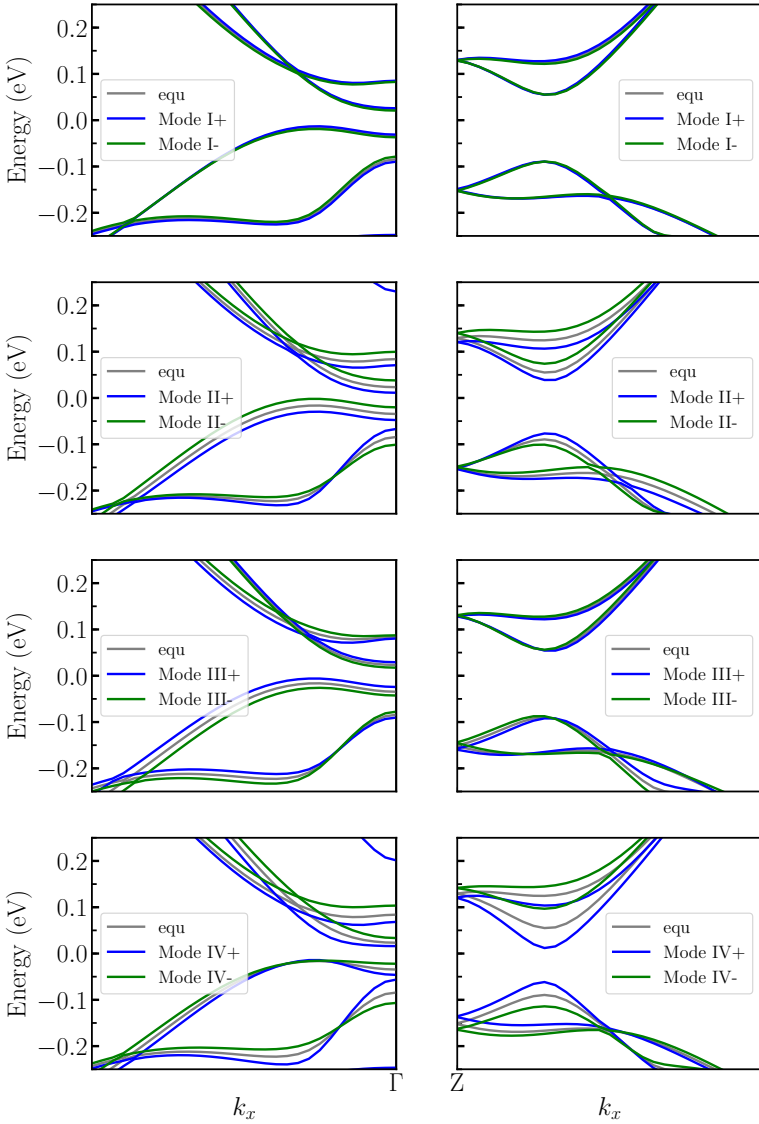

**Supplementary Figure 12** Frozen phonon bandstructures after DFT calculation using the PBE functional. We displayed the result for the four Raman active phonons presented in section 5 of the main text. They show similar behavior as the results after  $G_0W_0$  calculation. In the  $G_0W_0$  calculation, however, the group velocity of the electrons is increased.

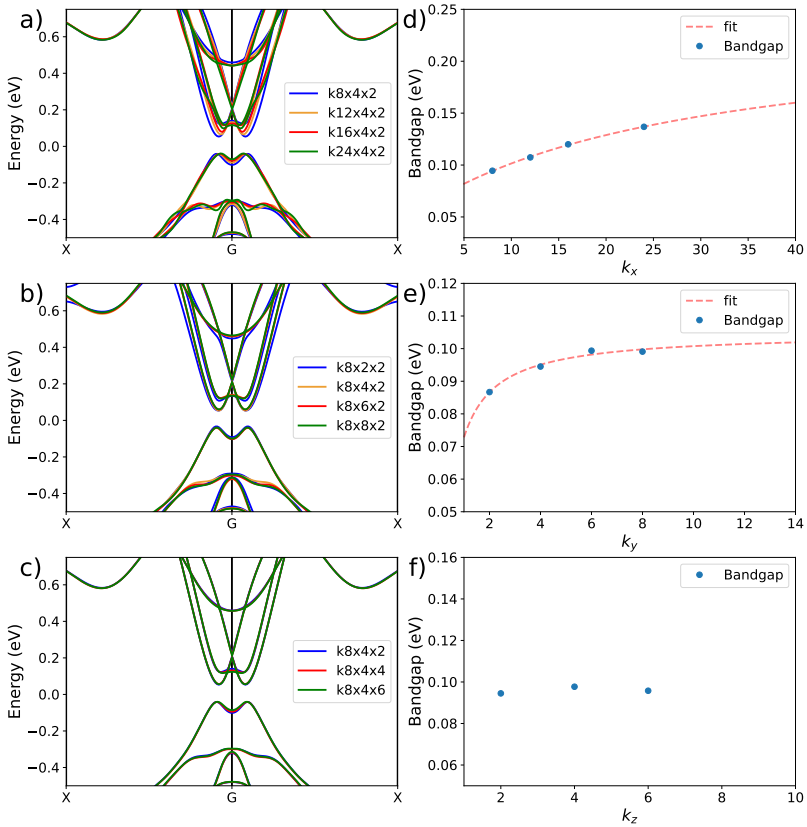

**Supplementary Figure 13** Convergence of the  $G_0W_0$  bandgap with the k-grid size. Convergence in each direction is tested separately using 640 unoccupied states, a 80eV Cutoff for the response function and 160 frequency grid points. The panels a) - c) show the corresponding bandstructures computed with an increasing k-mesh into the different directions. the panels d)-f) show the convergence of the bandgap using increasing meshes.  $k_x$ ,  $k_y$  and  $k_z$  count the number of k-points along the corresponding reciprocal lattice vector. In red dashed lines an extrapolation is displayed. In  $k_z$  direction we have too few data points for an extrapolation, but the 3 data points suggest, that convergence is already achieved for 2 points in this direction

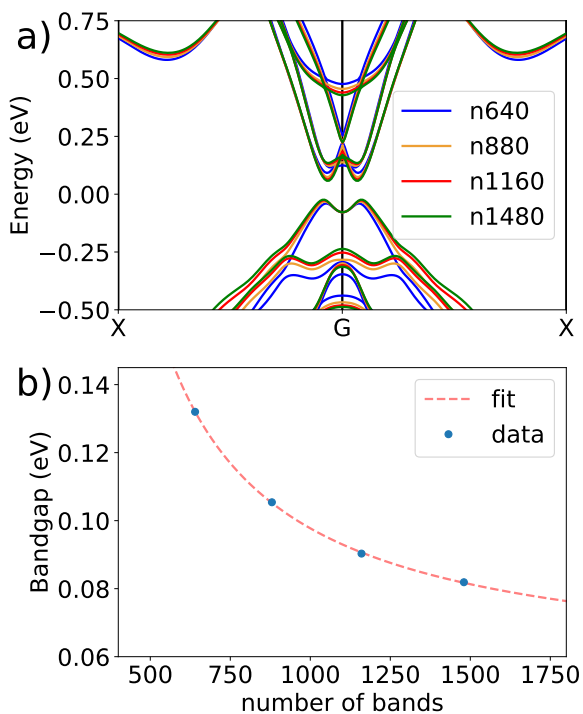

**Supplementary Figure 14**  $G_0W_0$  convergence using an increasing amount of unoccupied states while also increasing the response function cutoff simultaneously. Panel a) shows the bandstructures for an increasing number of states included in the response function calculation. Panel b) shows the convergence of the bandgap for an increasing number of orbitals included.

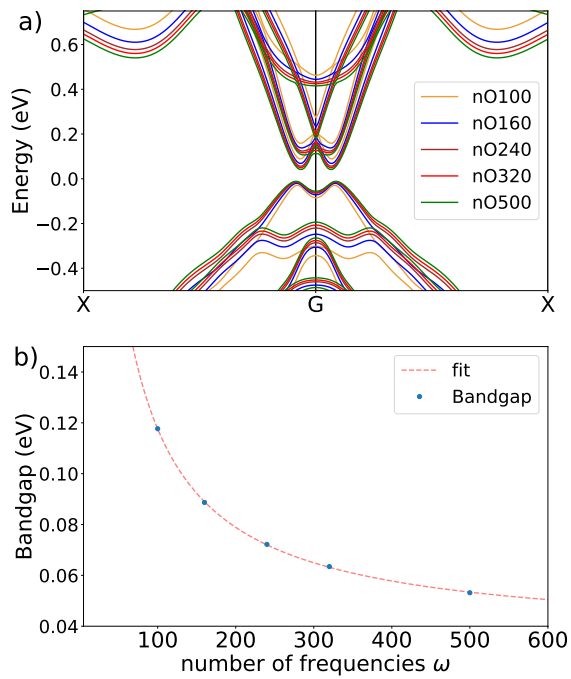

**Supplementary Figure 15**  $G_0W_0$  convergence using an increasing amount of frequencies  $\omega$ . Panel a) shows the bandstructures for an increasing number of frequencies included in the screened interaction calculation. Panel b) shows the convergence of the bandgap.

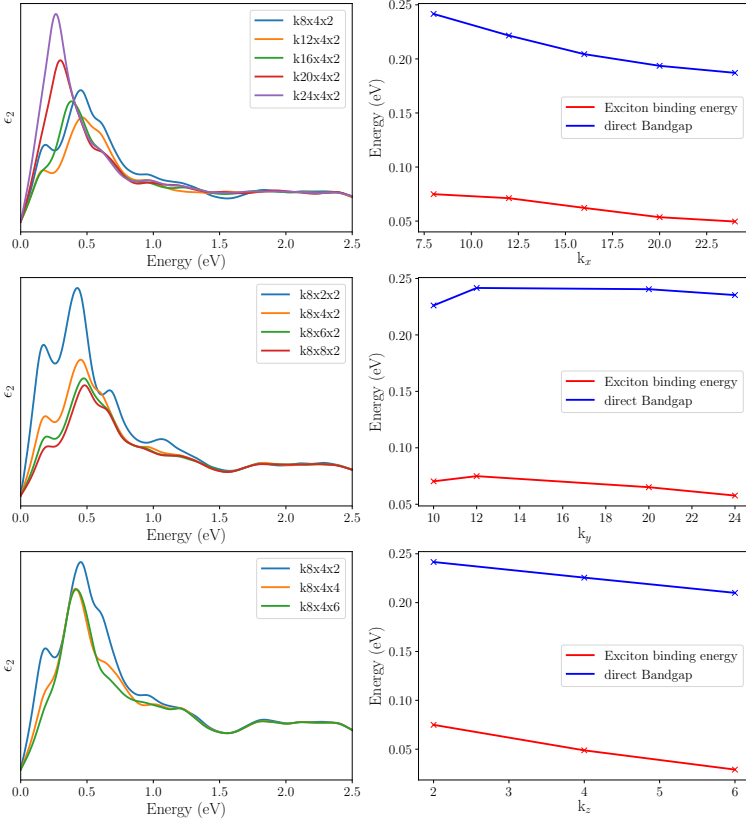

**Supplementary Figure 16** Convergence of the dielectric function and BSE eigenenergies after solving the BSE using different number of k-points along the 3 axes. We see, that we need many k-Points in x-direction to obtain a converged BSE calculation. This makes sense, as we need a fine grid sampling in this direction to probe the bandgap extrema as well as its highly dispersive character in x-direction.

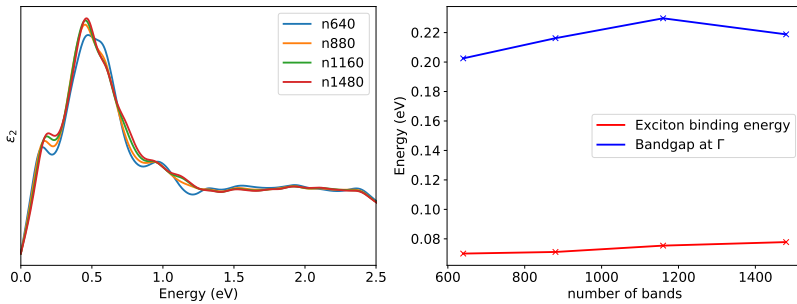

**Supplementary Figure 17** Convergence of the dielectric function and BSE eigenenergies after solving the BSE using different number of unoccupied states for the calculation of the screened interaction and  $G_0W_0$  calculation.

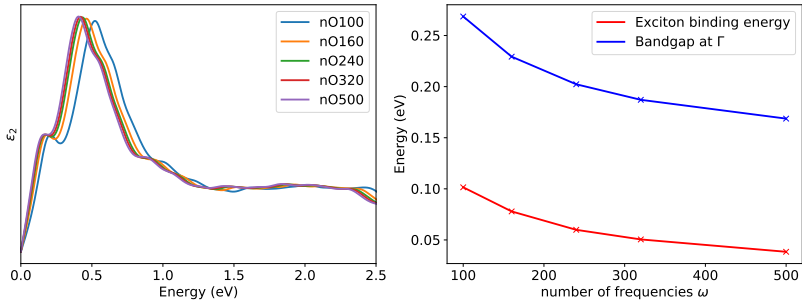

**Supplementary Figure 18** Convergence of the dielectric function and BSE eigenvalues after solving the BSE using different number of frequencies for the computation of the screened interaction and the  $G_0W_0$  calculation

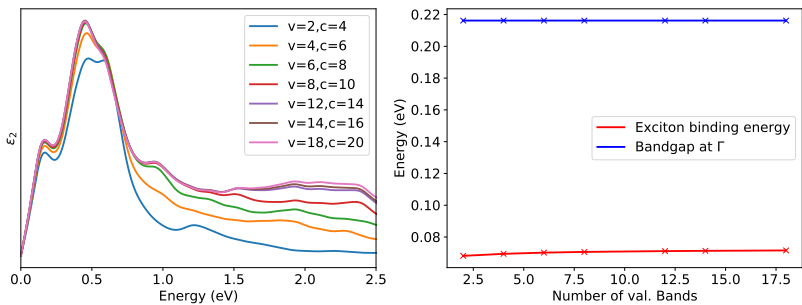

**Supplementary Figure 19** Convergence of the dielectric function and first exciton energy after solving the Bethe-Salpeter equation including an increasing number of valence and conduction bands. We see, that including the first 12 valence and 14 conduction bands results in a well converged dielectric function and excitonic energies.



## Supplementary References

198  
199  
200  
201  
202  
203  
204  
205  
206  
207  
208  
209  
210  
211  
212  
213  
214  
215  
216  
217  
218  
219  
220  
221  
222  
223  
224  
225  
226  
227  
228  
229  
230  
231  
232

- [1] Sugimoto, K., Nishimoto, S., Kaneko, T. & Ohta, Y. Strong coupling nature of the excitonic insulator state in Ta<sub>2</sub>NiSe<sub>5</sub>. *Phys. Rev. Lett.* **120**, 247602 (2018) .
- [2] Becke, A. D. & Johnson, E. R. A simple effective potential for exchange. *J. Chem. Phys.* **124** (22), 221101 (2006). <https://doi.org/10.1063/1.2213970> .
- [3] Becke, A. D. & Roussel, M. R. Exchange holes in inhomogeneous systems: A coordinate-space model. *Phys. Rev. A* **39**, 3761–3767 (1989) .
- [4] Tran, F. & Blaha, P. Accurate band gaps of semiconductors and insulators with a semilocal exchange-correlation potential. *Phys. Rev. Lett.* **102**, 226401 (2009) .
- [5] Heyd, J., Scuseria, G. E. & Ernzerhof, M. Hybrid functionals based on a screened coulomb potential. *J. Chem. Phys.* **118** (18), 8207–8215 (2003) .
- [6] Lee, J. *et al.* Strong interband interaction in the excitonic insulator phase of Ta<sub>2</sub>NiSe<sub>5</sub>. *Phys. Rev. B* **99**, 075408 (2019) .
- [7] Lu, Y. F. *et al.* Zero-gap semiconductor to excitonic insulator transition in Ta<sub>2</sub>NiSe<sub>5</sub>. *Nat. Commun.* **8** (1) (2017) .
- [8] Sunshine, S. A. & Ibers, J. A. Structure and physical properties of the new layered ternary chalcogenides tantalum nickel sulfide (Ta<sub>2</sub>NiS<sub>5</sub>) and tantalum nickel selenide (Ta<sub>2</sub>NiSe<sub>5</sub>). *Inorg. Chem.* **24** (22), 3611–3614 (1985) .
- [9] Nakano, A. *et al.* Antiferroelectric distortion with anomalous phonon softening in the excitonic insulator Ta<sub>2</sub>NiSe<sub>5</sub>. *Phys. Rev. B* **98**, 045139 (2018) .
- [10] Klimeš, J. c. v., Kaltak, M. & Kresse, G. Predictive gw calculations using plane waves and pseudopotentials. *Phys. Rev. B* **90**, 075125 (2014) .
- [11] Mostofi, A. A. *et al.* An updated version of wannier90: A tool for obtaining maximally-localised wannier functions. *Comput. Phys. Commun.* **185** (8), 2309 – 2310 (2014) .
- [12] Salpeter, E. E. & Bethe, H. A. A relativistic equation for bound-state problems. *Phys. Rev.* **84**, 1232–1242 (1951) .
- [13] Sander, T., Maggio, E. & Kresse, G. Beyond the tamm-dancoff approximation for extended systems using exact diagonalization. *Phys. Rev. B* **92**, 045209 (2015) .

- 233 [14] Dancoff, S. M. Non-adiabatic meson theory of nuclear forces. *Phys. Rev.*  
234 **78**, 382–385 (1950) .
- 235 [15] Nakano, A. *et al.* Pressure-induced coherent sliding-layer transition in the  
236 excitonic insulator  $\text{Ta}_2\text{NiSe}_5$ . *IUCrJ* **5** (2), 158–165 (2018) .
- 237 [16] Ye, M. *et al.* Lattice dynamics of the excitonic insulator  $\text{Ta}_2\text{Ni}(\text{Se}_{1-x}\text{S}_x)_5$ .  
238 *Phys. Rev. B* **104**, 045102 (2021) .
